# Supplementary material for: Development of Strategies for SNP Detection in RNA-Seq Data: Application to Lymphoblastoid Cell Lines and Evaluation Using 1000 Genomes Data
Source: PLOS journal article supplement (doi:10.1371/journal.pone.0058815), 2013-03-26
Supplement: S2 (10.1371/journal.pone.0058815.s002) [file journal.pone.0058815.s002]

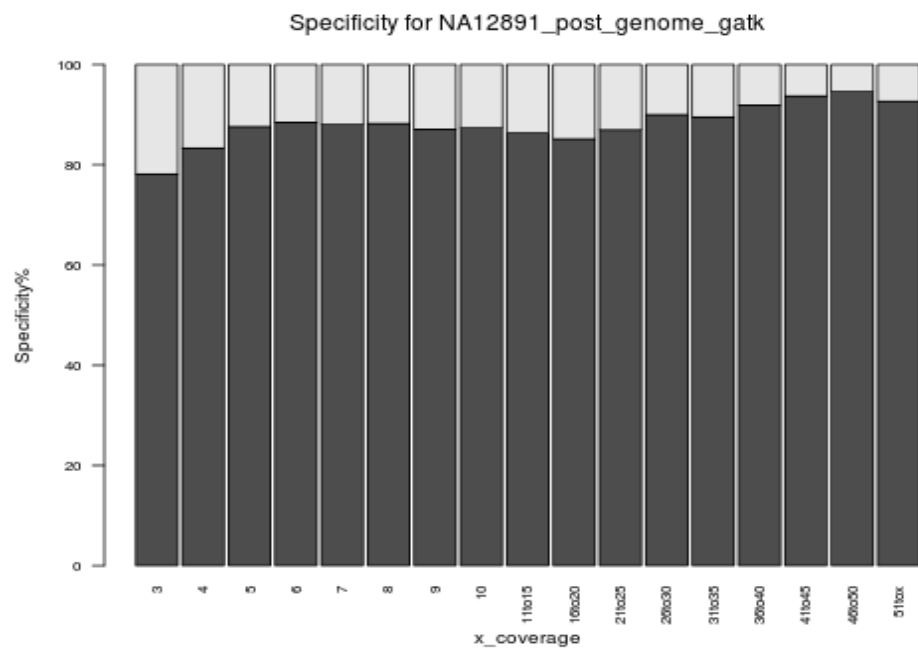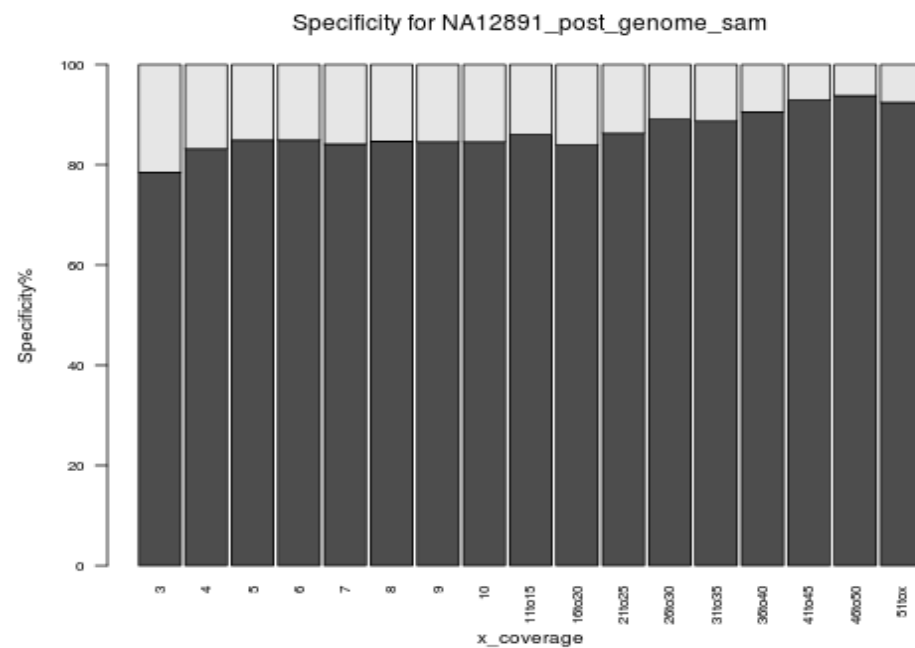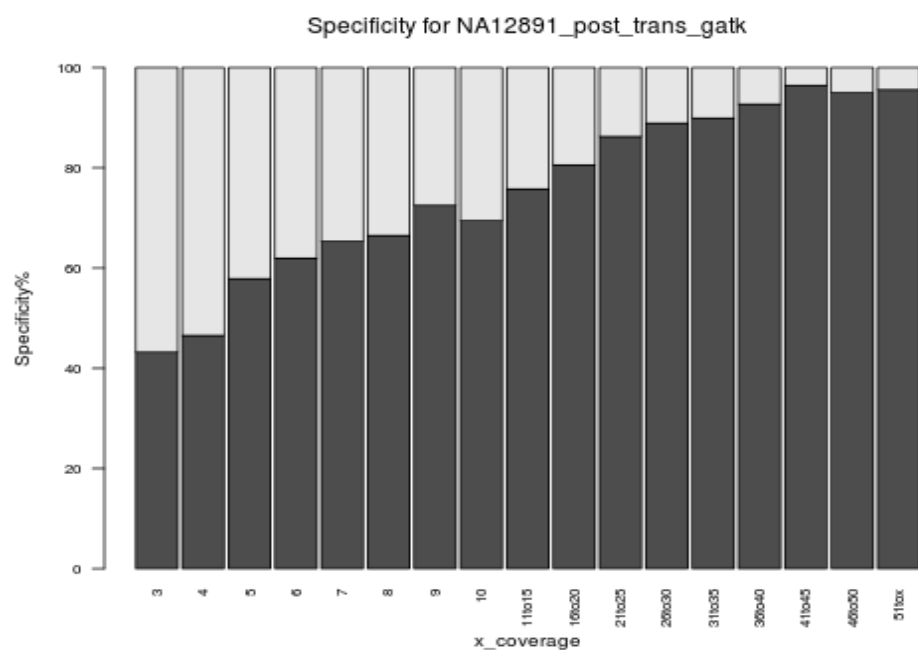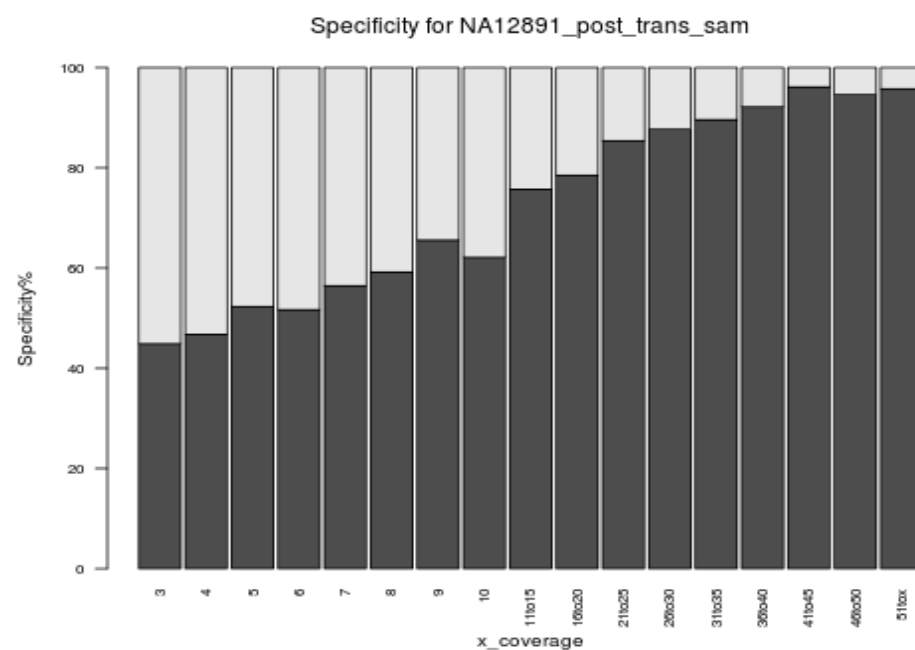

**Supplementary Figure 2: Specificity of the SNP calls from RNA-seq data for NA12891.** This figure displays the specificity of the SNP calls for NA12891 using 4 methods at a range of coverage depths.
